# Supplementary material for: Construction of triazine-based COF/Zr-based MOF S-scheme heterojunctions for efficient photocatalytic H2O2 production under simulated sunlight irradiation
Source: Research Square preprint supplement (doi:10.21203/rs.3.rs-8762228/v1), 2026-02-19
Supplement: Supplementary file 1 [file dc9692b0bd900fe839e5b32b.docx]

**Supplementary Material**

**Construction of triazine-based COF/Zr-based MOF S-scheme heterojunctions for efficient photocatalytic H2O2 production under simulated sunlight irradiation**

**Lisong Chen a,b, Yunchao Zhang c, Yan Yan c, Jinhui Jiang a,c, Rongfeng Guan a,b,*, Pengyu Dong a,c,***

a Key Laboratory for Advanced Technology in Environmental Protection of Jiangsu Province, Yancheng Institute of Technology, Jiangsu, China.

b School of Chemistry and Chemical Engineering, Yancheng Institute of Technology, Jiangsu, China.

c School of Materials Science and Engineering, Yancheng Institute of Technology, Jiangsu, China.

* Corresponding authors.

*E-mail addresses:* [rongfengg@163.com](mailto:rongfengg@163.com) (R. Guan), dongpy11@ycit.edu.cn (P. Dong).

**1. Additional experimental section**

**1.1. Detection of H2O2**

After sampling every 15 min, solid-liquid separation procedure was carried out with a filter of 0.22 μm. To this solution, 1 mL of 0.1 mol·L−1 aqueous potassium hydrogen phthalate (C8H5KO4) solution and 1 mL of 0.4 mol·L−1 aqueous potassium iodide (KI) solution was added, and the mixture was allowed to sit for 30 minutes. Under acidic conditions (H2O2 + 3I− + 2H+ → I3− + 2H2O), H2O2 molecules reacted with iodide anions (I−) to produce triiodide anions (I3−) with strong absorption around 350 nm. The quantity of I3− was determined via UV-vis spectroscopy based on the absorbance at 350 nm, which allowed the estimation of the amount of H2O2 produced during each reaction.

**1.2. Measurement and calculation of apparent quantum efficiency**

The measurement of AQE (Apparent Quantum efficiency) for H2O2 evolution was conducted under monochromatic light irradiation (300 W xenon lamp, λ = 420, 450, 500, and 550  nm). The concentration of catalyst is 0.3 mg/mL, and the radiation area is 6.9 cm2.The calculation formula for AQE was estimated as following equation:

The number of incident photons is:

Where I is the light power intensity (W m−2), S is the irradiation area (m2), t is the reaction time (s), λ is the wavelength length (m) of the monochromatic light, h is Planck’s constant (6.63×10−34 m2 kg s−1), and c is the speed of light in free space (3.0 ×108 m s−1).

**2. Supplementary Figures**

**Fig. S1** The H2O2 concentration-absorbance standard curve.

The absorbance and standard fitting curves of H2O2 aqueous solutions with different known concentrations reacted with potassium iodide are shown in Fig. S1.


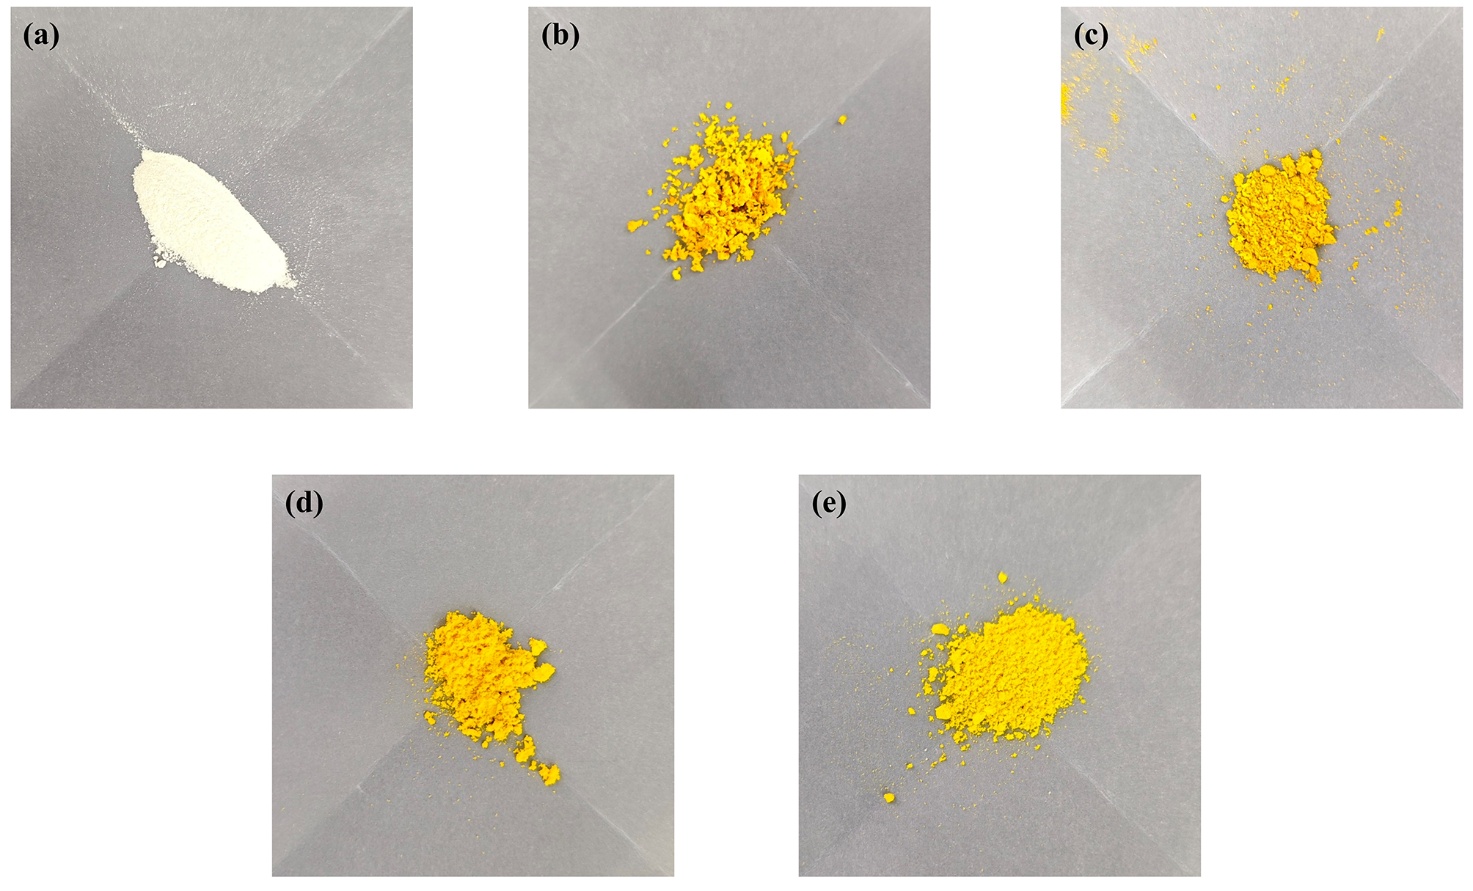


**Fig. S2.** Optical photograph of (a) NH2-UiO-66, (b) TFPT-Pa(CH3)2, (c) TNU-1, (d) TNU-2 and (e) TNU-3.


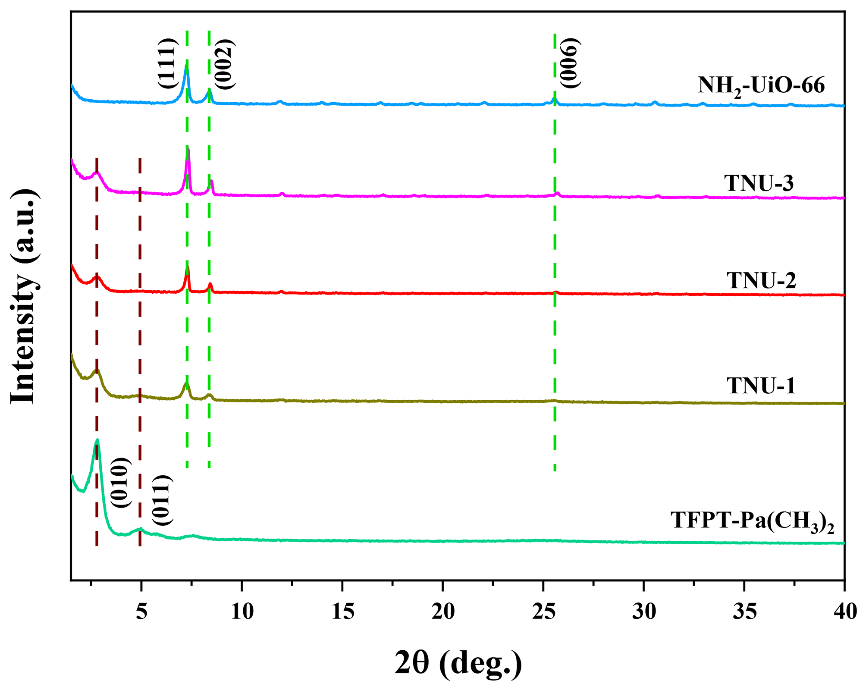


**Fig. S3.** XRD patterns of as-prepared products after photocatalytic cycles.


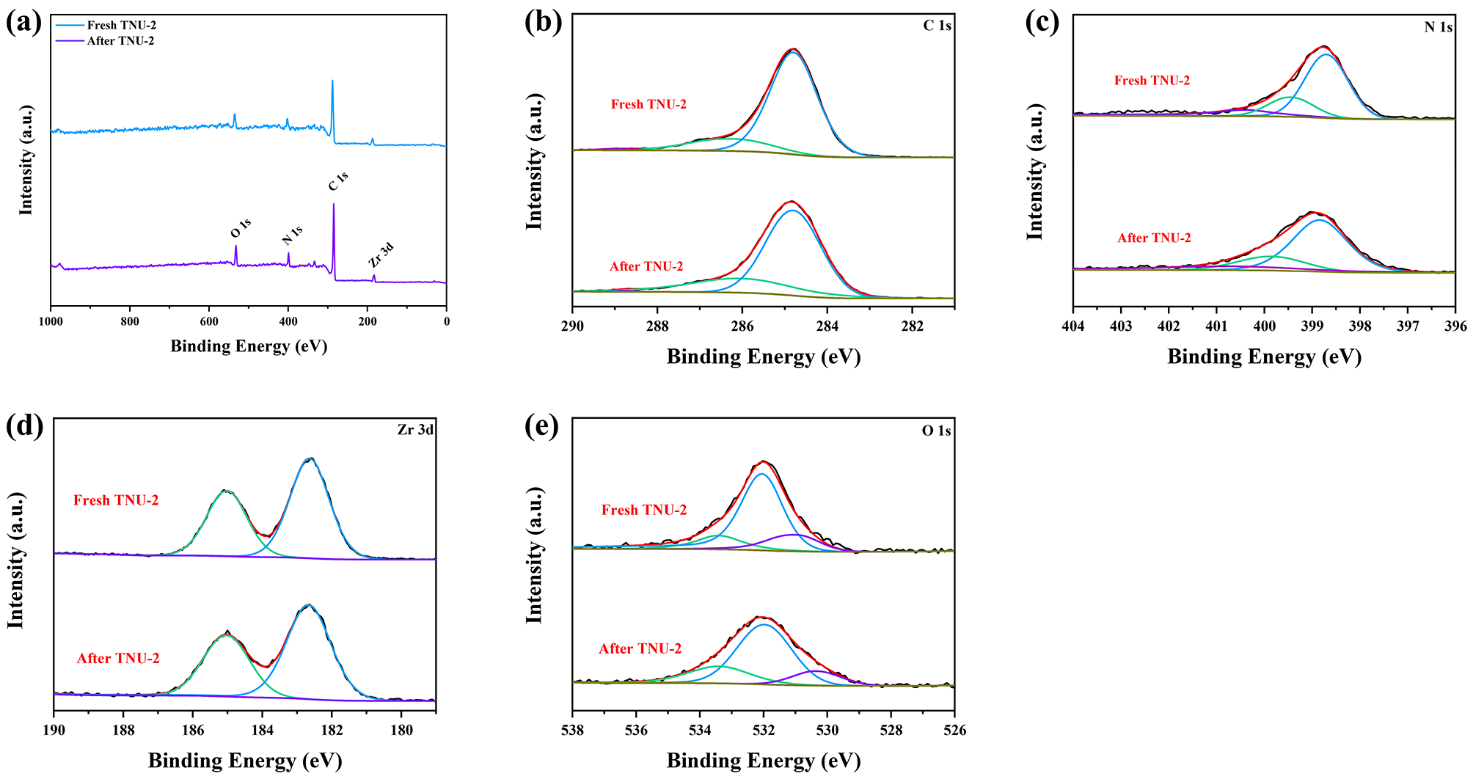


**Fig. S4.** (a) XPS survey, (b) C1s, (c) N 1s, (d) O 1s of TNU-2 before and after photocatalytic cycles.

**3. Supplementary Table**

**Table S1.** BET-specific surface area and pore volume of TFPT-Pa(CH3)2，NH2-UiO-66 and TNU-2 samples.

| Samples | BET-specific surface area  (m2 g−1) | Pore volume  (cm3 g−1) |
| --- | --- | --- |
| TFPT-Pa(CH3)2 | 467 | 0.529 |
| NH2-UiO-66 | 795 | 0.622 |
| TNU-2 | 689 | 0.577 |
